# Supplementary material for: The Protective Effects of CD39 Overexpression in Multiple Low-Dose Streptozotocin–Induced Diabetes in Mice
Source: PubMed Central journal article supplement — Diabetes. 2013 May 20;62(6):2026–35. doi: 10.2337/db12-0625 (PMC3661652; doi:10.2337/db12-0625), 2013-05-20
Supplement: supp_db12-0625_DB120625SupplementaryData.pdf [file supp_db12-0625_DB120625SupplementaryData.pdf]

SUPPLEMENTARY DATA

**Supplementary Figure 1.** MLDS-diabetes is T-cell mediated. Diabetes incidence of WT mice treated with the T-cell depleting monoclonal antibody KT3 (□, n=6) or saline (■, n=6). \*\*\* $P < 0.001$ .

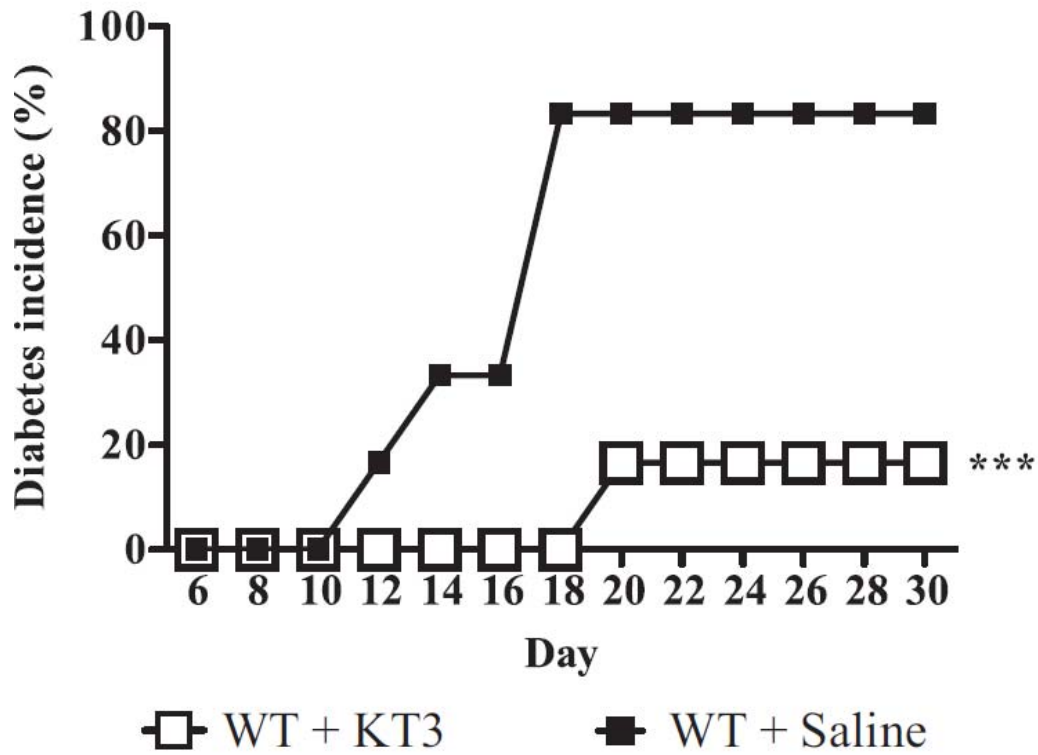

SUPPLEMENTARY DATA

**Supplementary Figure 2.** Confirmation of reconstitution of BM chimeric mice. Representative FACS profiles of human CD39 (hCD39) expression on peripheral blood leukocytes from 9-week old chimeric mice. Black – CD39TG control; Grey – WT control; Dotted black – CD39TG<sub>WTBM</sub>.

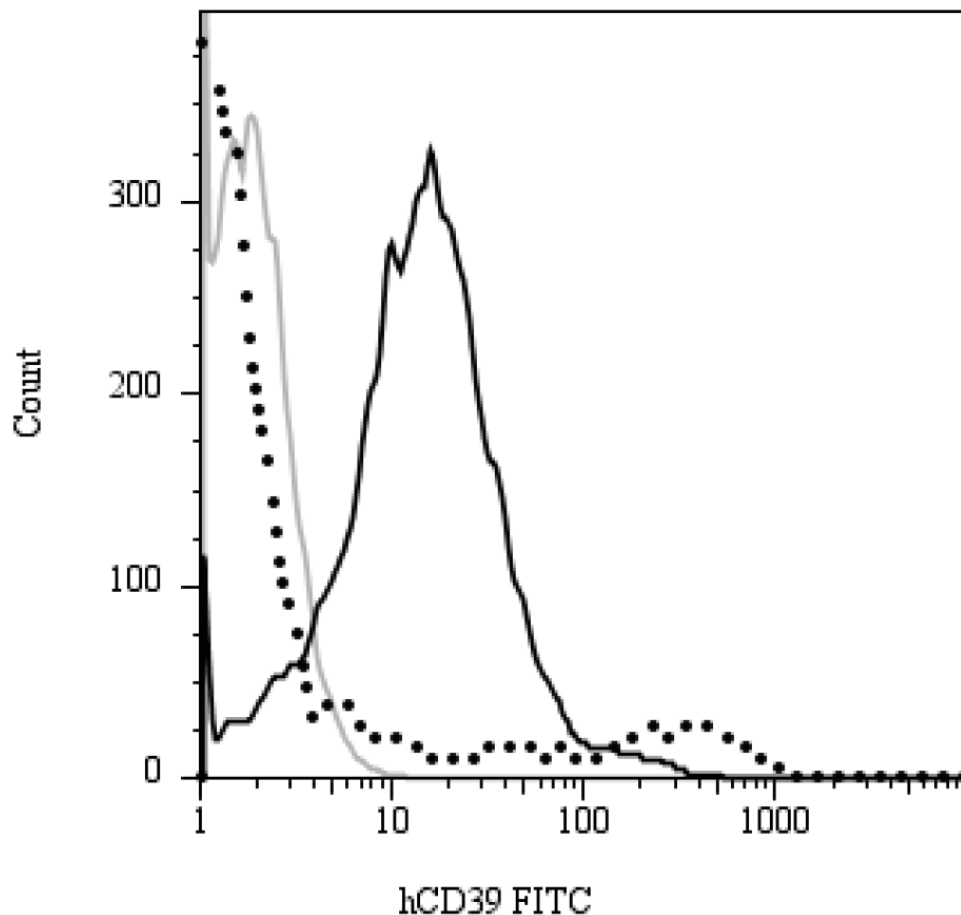

SUPPLEMENTARY DATA

**Supplementary Figure 3.** A1R does not play a role in the pathogenesis of MLDS-induced diabetes A. Diabetes incidence of WT mice treated with A1Ri (□, n=4) or vehicle (0.1% DMSO) (■, n=6). ns – not significant. B. Diabetes incidence of WT mice treated with A1Rag (□, n=6) or saline (■, n=4). ns – not significant.

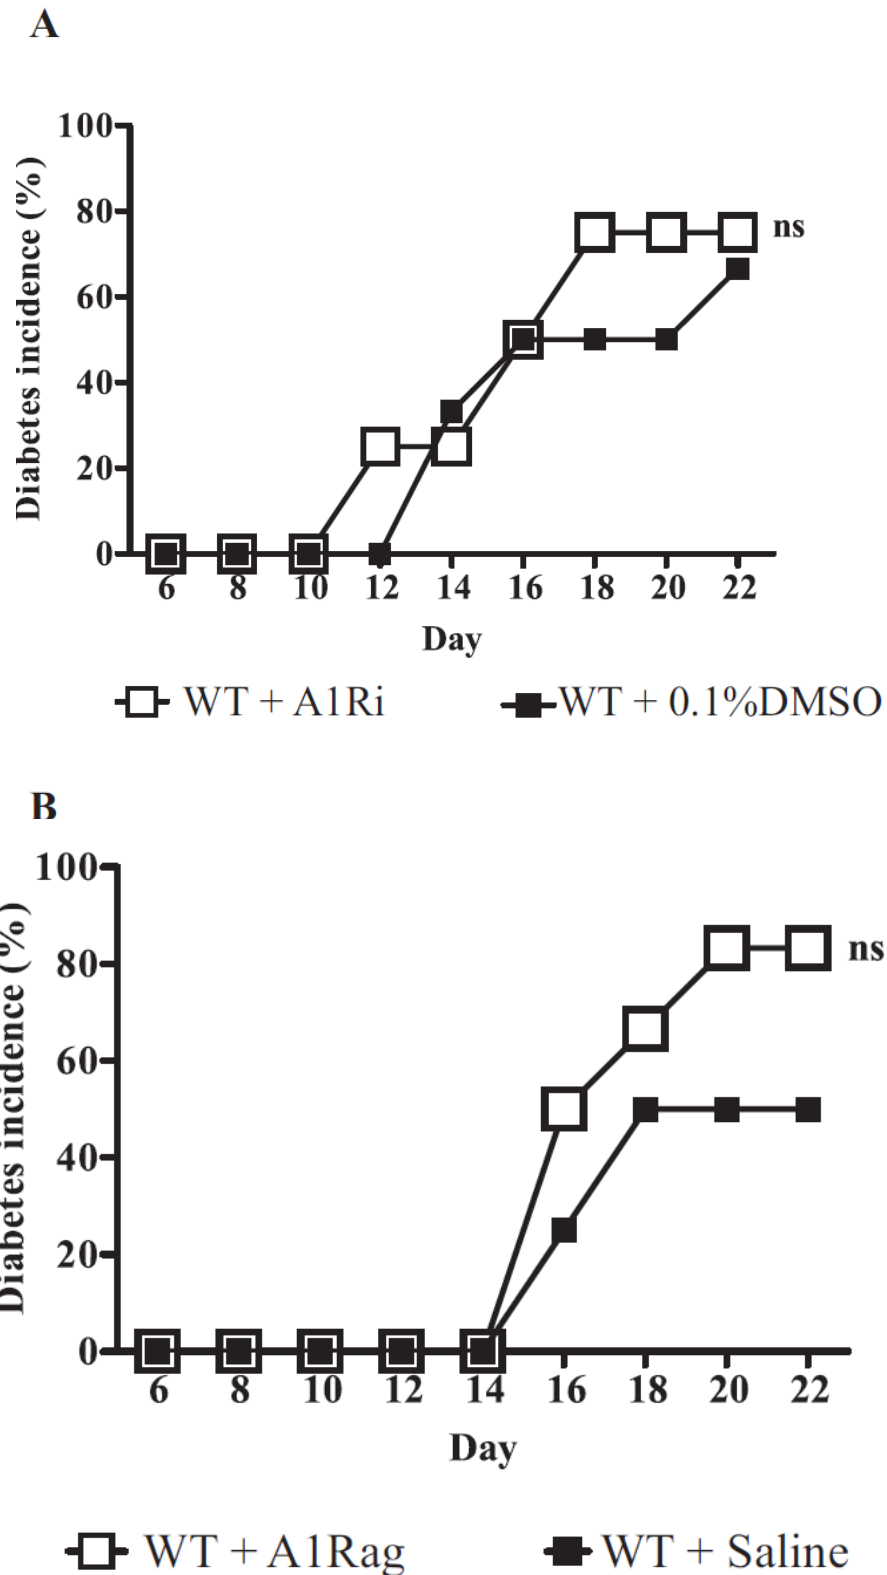

## SUPPLEMENTARY DATA

**Supplementary Figure 4.** Confirmation of genotype in the A2AR KO/CD39 TG progeny. A. Representative FACS profile of peripheral blood leukocytes of 5-week old A2ARKO/CD39TG mice, stained with FITC-conjugated anti-human CD39. Dotted black – progeny; Grey – WT control; Black – CD39TG control B. PCR analysis of genomic DNA from offspring of the A2ARKO/CD39TG cross. C. Primers and primer sequences used in B.

# A

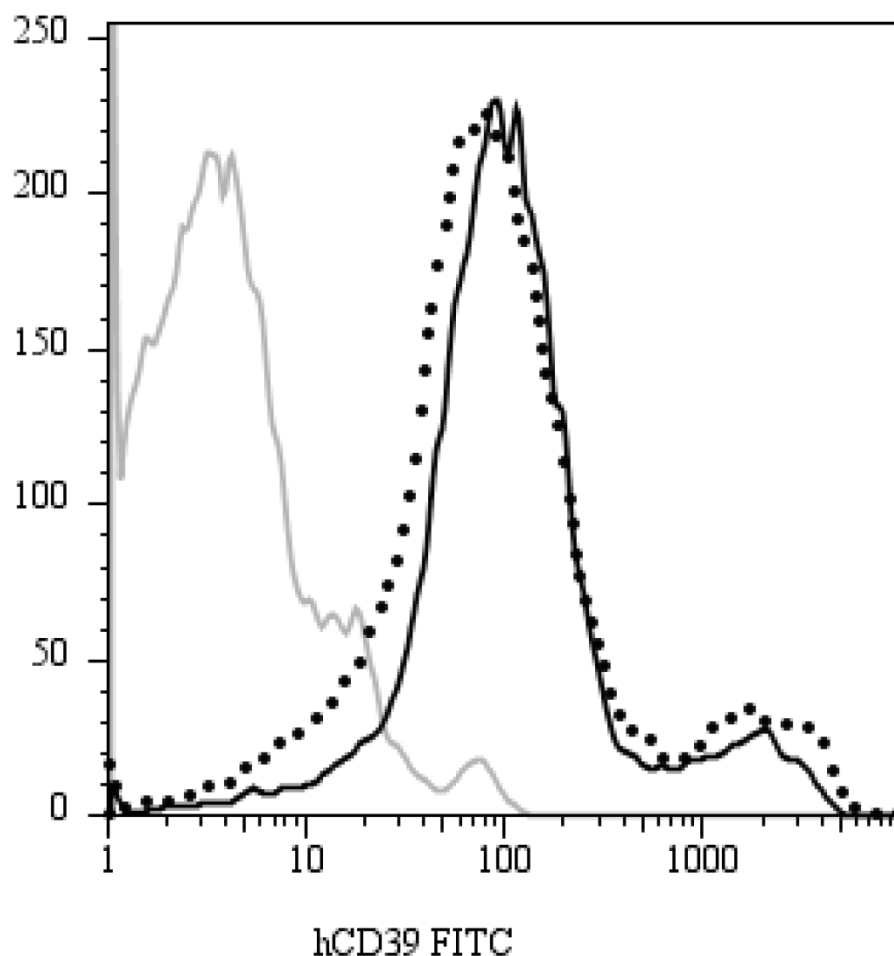

SUPPLEMENTARY DATA

**B**

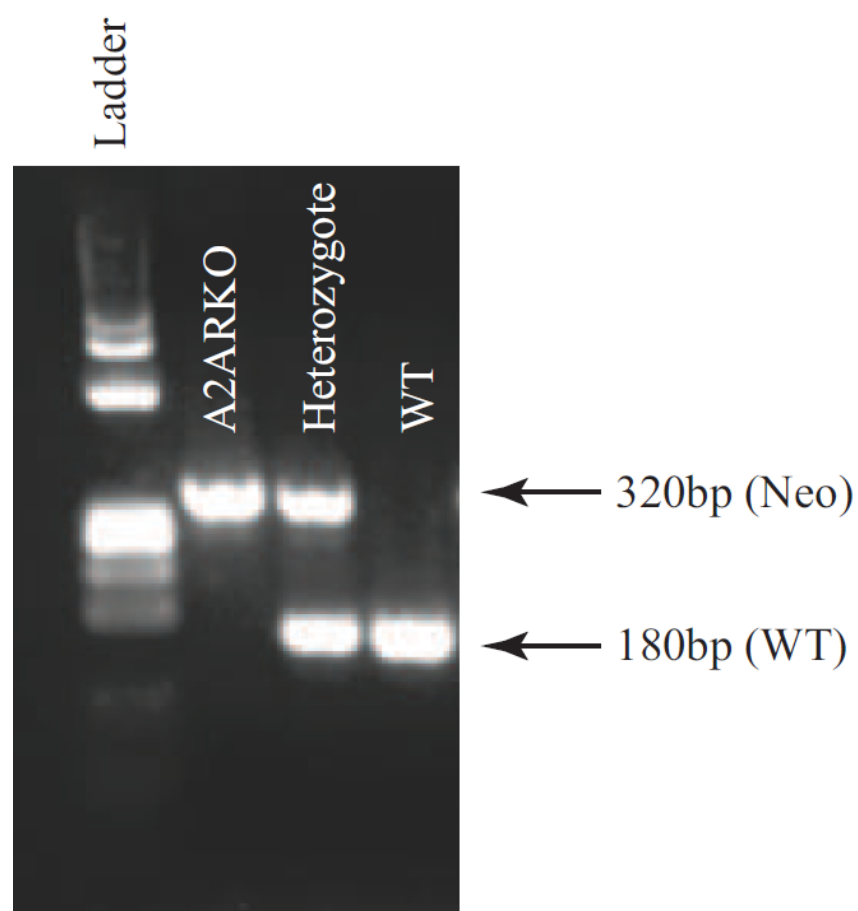

**C**

| Primer   | Specificity     | Sequence              |
|----------|-----------------|-----------------------|
| A2A WT-F | WT sequence     | AGCCAGGGGTTACATCTGTG  |
| A2A WT-R | WT sequence     | TACAGACAGCCTCGACATGTG |
| Neo 2-F  | A2ARKO sequence | TCGGCCATTGAACAAGATGG  |
| Neo 3-R  | A2ARKO sequence | GAGCAAGGTGAGATGACAGG  |
